# Supplementary material for: Emerging Trends and Research Foci of Deep Learning in Spine: Bibliometric and Visualization Study
Source: Research Square preprint supplement (doi:10.21203/rs.3.rs-2590723/v1), 2023-02-20
Supplement: Supplementary file 1 [file aa9ea430a68d6cc7c10a7bb6.docx]

**Supplemental Table 1.** **The analytic consequence of 113 keywords with at least 10 occurrence times**

| **No.** | **Label** | **Cluster** | **Occurrences** | **Average appearing years (AAY)** |
| --- | --- | --- | --- | --- |
| 1 | reconstruction | 1 | 21 | 2021.4762 |
| 2 | mean absolute error | 1 | 11 | 2021.3636 |
| 3 | automatic segmentation | 1 | 10 | 2021.3 |
| 4 | cobb angle measurement | 1 | 10 | 2021.3 |
| 5 | x ray | 1 | 19 | 2021.2632 |
| 6 | gold standard | 1 | 12 | 2021.25 |
| 7 | cobb angle | 1 | 19 | 2021.2105 |
| 8 | doctor | 1 | 16 | 2021.1875 |
| 9 | manual measurement | 1 | 11 | 2021.1818 |
| 10 | degree | 1 | 28 | 2021.1786 |
| 11 | dsc | 1 | 12 | 2021.1667 |
| 12 | u net | 1 | 19 | 2021.1579 |
| 13 | scoliosis | 1 | 21 | 2021.1429 |
| 14 | x ray image | 1 | 22 | 2021.1364 |
| 15 | adolescent idiopathic scoliosis | 1 | 8 | 2021.125 |
| 16 | measurement | 1 | 33 | 2021.1212 |
| 17 | framework | 1 | 32 | 2021.0938 |
| 18 | limitation | 1 | 16 | 2021.0625 |
| 19 | dice similarity coefficient | 1 | 18 | 2021 |
| 20 | state | 1 | 33 | 2020.9697 |
| 21 | segmentation | 1 | 87 | 2020.954 |
| 22 | structure | 1 | 43 | 2020.9302 |
| 23 | deep learning method | 1 | 12 | 2020.9167 |
| 24 | computer | 1 | 27 | 2020.8889 |
| 25 | segment | 1 | 26 | 2020.8846 |
| 26 | experiment | 1 | 23 | 2020.8261 |
| 27 | vertebra | 1 | 33 | 2020.8182 |
| 28 | intervertebral disc | 1 | 21 | 2020.7619 |
| 29 | problem | 1 | 25 | 2020.76 |
| 30 | medical image | 1 | 16 | 2020.75 |
| 31 | challenge | 1 | 23 | 2020.7391 |
| 32 | manual segmentation | 1 | 11 | 2020.7273 |
| 33 | paper | 1 | 54 | 2020.6852 |
| 34 | sequence | 1 | 19 | 2020.6842 |
| 35 | order | 1 | 22 | 2020.6818 |
| 36 | proposed method | 1 | 9 | 2020.6667 |
| 37 | task | 1 | 43 | 2020.6279 |
| 38 | experimental result | 1 | 13 | 2020.6154 |
| 39 | vertebrae | 1 | 63 | 2020.5079 |
| 40 | mr image | 1 | 20 | 2020.5 |
| 41 | part | 1 | 16 | 2020.4375 |
| 42 | work | 1 | 21 | 2020.2857 |
| 43 | localization | 1 | 18 | 2020.1667 |
| 44 | identification | 1 | 21 | 2020.0476 |
| 45 | image quality | 2 | 15 | 2021.6667 |
| 46 | external validation | 2 | 14 | 2021.6429 |
| 47 | mean age | 2 | 16 | 2021.5625 |
| 48 | reference standard | 2 | 11 | 2021.5455 |
| 49 | test set | 2 | 11 | 2021.5455 |
| 50 | male | 2 | 12 | 2021.5 |
| 51 | resnet | 2 | 8 | 2021.5 |
| 52 | radiograph | 2 | 36 | 2021.4722 |
| 53 | model performance | 2 | 15 | 2021.4 |
| 54 | test | 2 | 27 | 2021.3704 |
| 55 | specificity | 2 | 42 | 2021.3571 |
| 56 | woman | 2 | 14 | 2021.3571 |
| 57 | characteristic curve | 2 | 9 | 2021.3333 |
| 58 | deep learning model | 2 | 32 | 2021.3125 |
| 59 | age | 2 | 26 | 2021.2692 |
| 60 | fracture | 2 | 26 | 2021.2692 |
| 61 | year | 2 | 58 | 2021.2586 |
| 62 | sensitivity | 2 | 48 | 2021.25 |
| 63 | sex | 2 | 8 | 2021.25 |
| 64 | group | 2 | 22 | 2021.2273 |
| 65 | diagnostic performance | 2 | 14 | 2021.2143 |
| 66 | retrospective study | 2 | 19 | 2021.2105 |
| 67 | class | 2 | 11 | 2021.1818 |
| 68 | testing | 2 | 17 | 2021.1765 |
| 69 | auc | 2 | 29 | 2021.1724 |
| 70 | dxa | 2 | 10 | 2021.1 |
| 71 | area | 2 | 63 | 2021.0952 |
| 72 | dual energy x ray absorptiometry | 2 | 11 | 2021.0909 |
| 73 | difference | 2 | 34 | 2021.0882 |
| 74 | bmd | 2 | 11 | 2021 |
| 75 | f1 score | 2 | 11 | 2021 |
| 76 | month | 2 | 9 | 2021 |
| 77 | osteoporosis | 2 | 16 | 2021 |
| 78 | receiver | 2 | 13 | 2021 |
| 79 | curve | 2 | 30 | 2020.9667 |
| 80 | presence | 2 | 13 | 2020.9231 |
| 81 | female | 2 | 12 | 2020.9167 |
| 82 | standard deviation | 2 | 12 | 2020.8333 |
| 83 | cervical spine | 2 | 11 | 2020.8182 |
| 84 | measure | 2 | 20 | 2020.75 |
| 85 | lumbar vertebrae | 2 | 10 | 2020.7 |
| 86 | quality | 3 | 15 | 2021.4 |
| 87 | technique | 3 | 52 | 2021.2885 |
| 88 | spine surgeon | 3 | 15 | 2021.2667 |
| 89 | application | 3 | 49 | 2021.1837 |
| 90 | machine learning | 3 | 24 | 2021.1667 |
| 91 | review | 3 | 26 | 2021.1538 |
| 92 | complication | 3 | 14 | 2021.1429 |
| 93 | article | 3 | 16 | 2021.125 |
| 94 | spine surgery | 3 | 20 | 2021.1 |
| 95 | study design | 3 | 11 | 2021.0909 |
| 96 | research | 3 | 27 | 2021.0741 |
| 97 | artificial intelligence | 3 | 37 | 2021.0541 |
| 98 | clinician | 3 | 23 | 2021 |
| 99 | field | 3 | 36 | 2021 |
| 100 | medicine | 3 | 10 | 2021 |
| 101 | outcome | 3 | 32 | 2020.9688 |
| 102 | clinical practice | 3 | 17 | 2020.9412 |
| 103 | grading | 3 | 14 | 2020.8571 |
| 104 | surgery | 3 | 27 | 2020.8519 |
| 105 | lumbar disc herniation | 3 | 11 | 2020.8182 |
| 106 | use | 3 | 32 | 2020.75 |
| 107 | pathology | 3 | 15 | 2020.7333 |
| 108 | need | 3 | 14 | 2020.7143 |
| 109 | ability | 3 | 16 | 2020.6875 |
| 110 | neural network | 3 | 97 | 2020.6701 |
| 111 | machine | 3 | 23 | 2020.6087 |
| 112 | lumbar | 3 | 10 | 2020.5 |
| 113 | disc | 3 | 12 | 2020.25 |
